# Supplementary material for: Gas chromatography-mass spectrometry using microvial insert thermal desorption for the determination of BTEX in edible oils
Source: Royal Society of Chemistry journal article supplement (doi:10.1039/c5ra26707b), 2016-01-01
Supplement: c5ra26707b1.pdf [file c5ra26707b1.pdf]

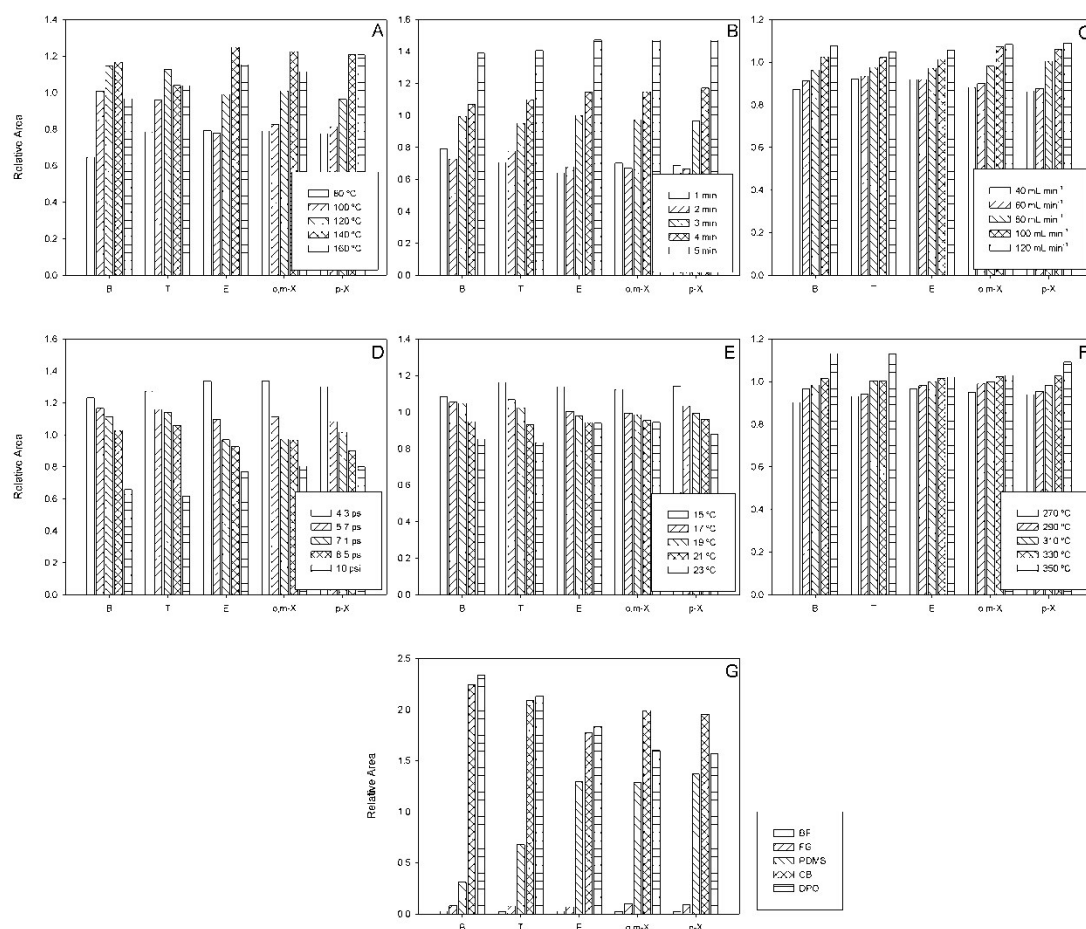

**Fig. S1** Effect of TDU temperature (A), TDU heating time (B), gas flow rate (C), gas pressure (D), PTV cooling temperature (E), PTV heating temperature (F) and PTV liner filling (G) on the response of each analyte.

**Table 1S** Slopes<sup>a</sup> of standard additions calibration graphs for three edible oils

| Compound            | Slope (mL $\mu\text{g}^{-1}$ ) |
|---------------------|--------------------------------|
|                     | Sunflower                      |
| Benzene             | 20.5 $\pm$ 1.5                 |
| Toluene             | 9.8 $\pm$ 0.9                  |
| Ethylbenzene        | 8.7 $\pm$ 0.9                  |
| m-Xylene / p-Xylene | 19.6 $\pm$ 1.9                 |
| o-Xylene            | 5.4 $\pm$ 0.6                  |

<sup>a</sup> Mean value  $\pm$  standard deviation (n= 6)
